# Supplementary material
Source: PubMed Central journal article supplement (PMC10652899)
Supplement: iai.00349-23-s0001.pdf [file iai.00349-23-s0001.pdf]

**Fig. 1S.** Hydrosalpinx scores from mice intramuscularly immunized with buffer or irrelevant antigen with/without adjuvants (-ve, n=60, black open triangle) versus mice with chlamydial antigens (n=5 x 23, pink open triangle)

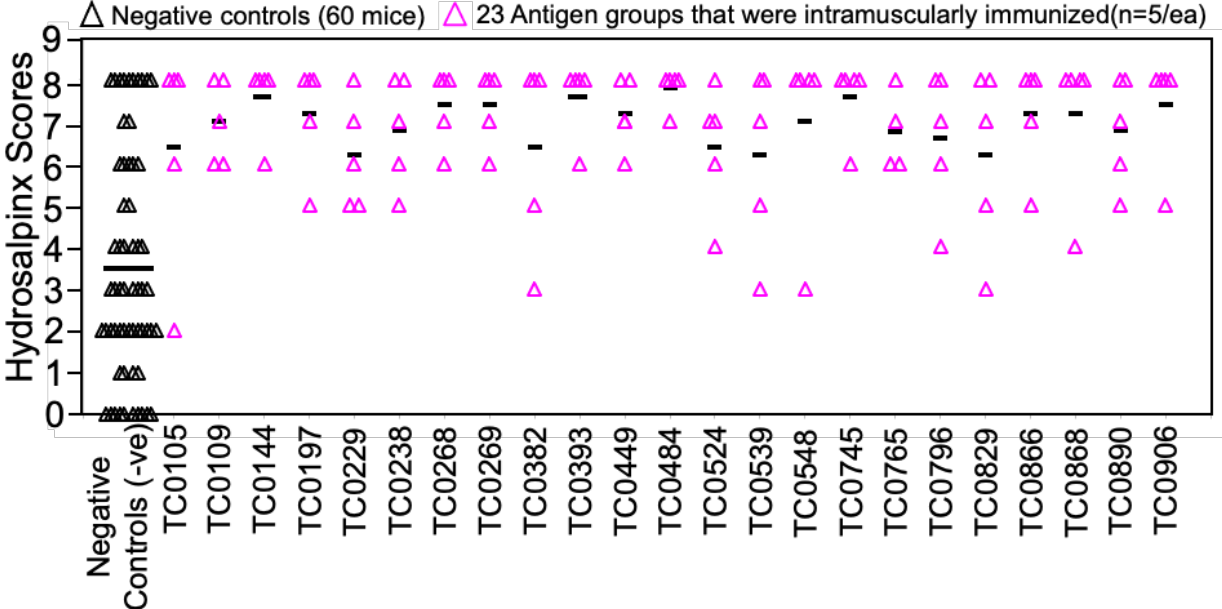

Fig.1S legend: The hydrosalpinx scores from the 60 negative immunization control mice from Fig.3 were shown in black open triangles here and those from mice intramuscularly immunized with each of 23 chlamydial antigens listed along the X-axis were shown in pink open triangles. Note that hydrosalpinx scores from each of the 23 antigen groups were significantly higher than that of the negative immunization control mice (2-tailed Wilcoxon,  $p < 0.05$ ).

**Table 1S:** Vaginal chlamydial burdens and hydrosalpinx scores from antigen groups reported in the current manuscript.

**Table 1S. Vaginal chlamydial burdens and oviduct hydrosalpinx scores of mouse groups reported in the current manuscript**

| Immunization regimen                      | Adjuvant      | Sample size | Group ID/Antigen (CT ORF)                      | Log10IFU in AUC (Mean ± SD) | Hydrosalpinx Score (Mean ± SD) | Experimental ID             |                  |
|-------------------------------------------|---------------|-------------|------------------------------------------------|-----------------------------|--------------------------------|-----------------------------|------------------|
| <b>Intramuscular Immunization Regimen</b> |               |             |                                                |                             |                                |                             |                  |
| IM+IM+IM                                  | None          | 5           | PBS                                            | 2.28 ± 0.56                 | 2.8 ± 2.95                     | VacExp 3                    | Negative Control |
| IM+IM+IM                                  | (CpG-IFA) x 3 | 5           | PBS                                            | 1.93 ± 0.69                 | 1.2 ± 1.1                      | VacExp 1                    |                  |
| IM+IM+IM                                  | (CpG-IFA) x 3 | 5           | GST (shedding monitored for 40 days)           | 2.59 ± 0.77                 | 4 ± 4                          | VacExp 3                    |                  |
| IM+IM+IM                                  | (CpG-IFA) x 3 | 30          | GST (From 6 expts with similar conditions)     | 2.96 ± 0.79                 | 3.83 ± 2.57                    | VacExp 6, 7, 9A, 10, 11, 12 |                  |
| IM+IM+IM                                  | (CpG-IFA) x 3 | 10          | GST (Bead complex used)                        | 2.73 ± 0.79                 | 3.9 ± 3.03                     | VacExp 6                    |                  |
| IM+IM+IM                                  | (DDA-TDB) x 3 | 5           | GST                                            | 2.98 ± 0.56                 | 3.6 ± 2.7                      | VacExp 6                    |                  |
| IM+IM+IM                                  | (CpG-IFA) x 3 | 5           | GST (Bead complex used, non-infection ctrl)    | 0 ± 0                       | 0 ± 0                          | VacExp 6                    | Positive Control |
| IM+IM+IM                                  | (CpG-IFA) x 3 | 5           | Live CM (shedding monitored for 30 days)       | 0.41 ± 0.32                 | 0.4 ± 0.55                     | VacExp 1                    |                  |
| IM+IM+IM                                  | (CpG-IFA) x 3 | 5           | Live CM (shedding monitored for 40 days)       | 0.89 ± 0.37                 | 1.4 ± 1.67                     | VacExp 3                    |                  |
| IM+IM+IM                                  | (CpG-IFA) x 3 | 20          | Live CM (From 4 expts with similar conditions) | 1.40 ± 0.29                 | 3.4 ± 3.03                     | VacExp 6, 10, 11, 12        |                  |
| IM+IM+IM                                  | (CpG-IFA) x 3 | 15          | UV-CM (Combined from 3 expts)                  | 1.92 ± 0.53                 | 2.67 ± 2.61                    | VacExp 7, 9A, 10            |                  |
| IM+IM+IM                                  | (CpG-IFA) x 3 | 5           | nMOMP (extracted from CM)                      | 1.44 ± 0.23 (p<0.05)        | 1.2 ± 0.84 (p=0.2116)          | VacExp 3                    |                  |
| IM+IM+IM                                  | (CpG-IFA) x 3 | 5           | pCM03 (pCT03)                                  | 2.86 ± 1.07                 | 4.2 ± 1.79                     | VacExp 7                    |                  |
| IM+IM+IM                                  | (CpG-IFA) x 3 | 9           | TC0003 (CT635) (Combined from 2 expts)         | 3.03 ± 0.92                 | 5.33 ± 2.96                    | VacExp 7, 9A                |                  |
| IM+IM+IM                                  | (CpG-IFA) x 3 | 5           | TC0035c (CT664c)                               | 3.12 ± 0.63                 | 4.8 ± 1.79                     | VacExp 7                    |                  |
| IM+IM+IM                                  | (CpG-IFA) x 3 | 5           | TC0037 (CT666)                                 | 3.36 ± 0.63                 | 4.4 ± 3.05                     | VacExp 6                    |                  |
| IM+IM+IM                                  | (CpG-IFA) x 3 | 5           | TC0038 (CT667)                                 | 2.39 ± 0.47                 | 3.6 ± 2.3                      | VacExp 10                   |                  |
| IM+IM+IM                                  | (CpG-IFA) x 3 | 5           | TC0041 (CT670)                                 | 3.36 ± 0.54                 | 3.4 ± 2.97                     | VacExp 12                   |                  |
| IM+IM+IM                                  | (CpG-IFA) x 3 | 5           | TC0044 (CT673)                                 | 3.08 ± 0.67                 | 1.6 ± 0.55                     | VacExp 1                    |                  |
| IM+IM+IM                                  | (CpG-IFA) x 3 | 5           | TC0047 (CT676)                                 | 2.57 ± 0.46                 | 4.6 ± 3.29                     | VacExp 10                   |                  |
| IM+IM+IM                                  | (CpG-IFA) x 3 | 4           | TC0066 (CT694)                                 | 2.54 ± 0.34                 | 2 ± 1.41                       | VacExp 1                    |                  |
| IM+IM+IM                                  | (CpG-IFA) x 3 | 5           | TC0070 (CT698)                                 | 2.81 ± 1.00                 | 2.6 ± 2.41                     | VacExp 6                    |                  |
| IM+IM+IM                                  | (CpG-IFA) x 3 | 5           | TC0093 (CT720)                                 | 3.34 ± 0.41                 | 6 ± 1.87                       | VacExp 12                   |                  |
| IM+IM+IM                                  | (CpG-IFA) x 3 | 5           | TC0105 (CT732)                                 | 3.00 ± 0.43                 | 8.4 ± 2.61 (p<0.05)            | VacExp 10                   |                  |
| IM+IM+IM                                  | (CpG-IFA) x 3 | 5           | TC0109 (CT736)                                 | 2.81 ± 0.58                 | 7 ± 1 (p<0.05)                 | VacExp 11                   |                  |
| IM+IM+IM                                  | (CpG-IFA) x 3 | 5           | TC0140 (CT759)                                 | 3.17 ± 1.00                 | 4.2 ± 2.86                     | VacExp 3                    |                  |
| IM+IM+IM                                  | (CpG-IFA) x 3 | 5           | TC0143 (CT762) (Bead complex used)             | 2.70 ± 1.09                 | 3.6 ± 2.51                     | VacExp 12                   |                  |
| IM+IM+IM                                  | (CpG-IFA) x 3 | 5           | TC0144 (CT763)                                 | 2.74 ± 0.36                 | 7.6 ± 0.89 (p<0.05)            | VacExp 11                   |                  |
| IM+IM+IM                                  | (CpG-IFA) x 3 | 5           | TC0152 (CT771)                                 | 2.71 ± 0.08                 | 3.2 ± 3.03                     | VacExp 10                   |                  |
| IM+IM+IM                                  | (CpG-IFA) x 3 | 5           | TC0153 (CT772)                                 | 2.55 ± 0.85                 | 2.6 ± 1.82                     | VacExp 10                   |                  |
| IM+IM+IM                                  | (CpG-IFA) x 3 | 5           | TC0156 (CT775)                                 | 3.21 ± 0.34                 | 3.8 ± 1.79                     | VacExp 10                   |                  |
| IM+IM+IM                                  | (CpG-IFA) x 3 | 5           | TC0172 (CT790)                                 | 2.58 ± 0.78                 | 5.2 ± 2.39                     | VacExp 11                   |                  |
| IM+IM+IM                                  | (CpG-IFA) x 3 | 5           | TC0177 (CT795)                                 | 3.33 ± 0.41                 | 3.6 ± 2.07                     | VacExp 3                    |                  |
| IM+IM+IM                                  | (CpG-IFA) x 3 | 5           | TC0181 (CT798)                                 | 2.84 ± 0.21                 | 5.4 ± 2.88                     | VacExp 7                    |                  |
| IM+IM+IM                                  | (CpG-IFA) x 3 | 5           | TC0190 (CT806)                                 | 2.90 ± 0.90                 | 3.2 ± 2.59                     | VacExp 11                   |                  |
| IM+IM+IM                                  | (CpG-IFA) x 3 | 5           | TC0197 (CT812) (Bead complex used)             | 2.72 ± 0.34                 | 7.2 ± 1.3 (p<0.05)             | VacExp 1                    |                  |
| IM+IM+IM                                  | (CpG-IFA) x 3 | 5           | TC0207 (CT820)                                 | 2.84 ± 0.54                 | 4.2 ± 2.95                     | VacExp 9A                   |                  |
| IM+IM+IM                                  | (CpG-IFA) x 3 | 10          | TC0215 (CT828) (Combined from 2 expts)         | 2.97 ± 0.73                 | 1.8 ± 2.74                     | VacExp 7, 10                |                  |
| IM+IM+IM                                  | (CpG-IFA) x 3 | 5           | TC0229 (CT841)                                 | 2.32 ± 0.47                 | 8.2 ± 1.3 (p<0.05)             | VacExp 1                    |                  |

|          |               |    |                                           |                      |                     |              |
|----------|---------------|----|-------------------------------------------|----------------------|---------------------|--------------|
| IM+IM+IM | (CpG-IFA) x 3 | 5  | TC0238 (CT849) (Bead complex used)        | 3.38 ± 0.81          | 6.8 ± 1.3 (p<0.05)  | VacExp 12    |
| IM+IM+IM | (CpG-IFA) x 3 | 5  | TC0268 (CT875)                            | 2.62 ± 0.54          | 7.4 ± 0.89 (p<0.05) | VacExp 11    |
| IM+IM+IM | (CpG-IFA) x 3 | 5  | TC0269 (CT001) (Bead complex used)        | 2.78 ± 0.58          | 7.4 ± 0.89 (p<0.05) | VacExp 11    |
| IM+IM+IM | (CpG-IFA) x 3 | 5  | TC0273 (CT005)                            | 2.66 ± 0.43          | 5.6 ± 1.67          | VacExp 6     |
| IM+IM+IM | (CpG-IFA) x 3 | 5  | TC0279 (CT011)                            | 3.33 ± 0.57          | 4.6 ± 3.05          | VacExp 10    |
| IM+IM+IM | (CpG-IFA) x 3 | 5  | TC0284 (CT016)                            | 3.26 ± 0.45          | 6.2 ± 2.68          | VacExp 10    |
| IM+IM+IM | (CpG-IFA) x 3 | 5  | TC0285 (CT017)                            | 2.67 ± 0.31          | 1.4 ± 1.52          | VacExp 7     |
| IM+IM+IM | (CpG-IFA) x 3 | 5  | TC0286 (CT018) (Bead complex used)        | 3.58 ± 0.60 (p<0.05) | 6.2 ± 2.68          | VacExp 12    |
| IM+IM+IM | (CpG-IFA) x 3 | 5  | TC0313 (CT043)                            | 3.62 ± 0.68 (p<0.05) | 1.4 ± 1.34          | VacExp 10    |
| IM+IM+IM | (CpG-IFA) x 3 | 5  | TC0318 (CT048)                            | 3.63 ± 0.65 (p<0.05) | 3 ± 1.87            | VacExp 7     |
| IM+IM+IM | (CpG-IFA) x 3 | 5  | TC0320 (CT050)                            | 3.12 ± 0.56          | 5.6 ± 3.21          | VacExp 10    |
| IM+IM+IM | (CpG-IFA) x 3 | 5  | TC0325 (CT055)                            | 3.30 ± 0.56          | 3 ± 2.35            | VacExp 10    |
| IM+IM+IM | (CpG-IFA) x 3 | 5  | TC0326 (CT056)                            | 3.24 ± 0.50          | 4 ± 3.67            | VacExp 10    |
| IM+IM+IM | (CpG-IFA) x 3 | 5  | TC0336 (CT066) (Bead complex used)        | 3.08 ± 0.48          | 1.6 ± 3.58          | VacExp 11    |
| IM+IM+IM | (CpG-IFA) x 3 | 5  | TC0338 (CT067)                            | 3.97 ± 0.56 (p<0.05) | 3.4 ± 1.14          | VacExp 7     |
| IM+IM+IM | (CpG-IFA) x 3 | 5  | TC0364 (CT089)                            | 3.69 ± 0.57 (p<0.05) | 3 ± 2.92            | VacExp 7     |
| IM+IM+IM | (CpG-IFA) x 3 | 5  | TC0375 (CT099)                            | 3.11 ± 0.38          | 3.2 ± 3.03          | VacExp 10    |
| IM+IM+IM | (DDA-TDB) x 3 | 5  | TC0375 (CT099)                            | 3.05 ± 0.56          | 3.4 ± 1.67          | VacExp 10    |
| IM+IM+IM | (CpG-IFA) x 3 | 5  | TC0376 (CT101)                            | 2.35 ± 0.60          | 3 ± 1               | VacExp 1     |
| IM+IM+IM | (CpG-IFA) x 3 | 5  | TC0382 (CT105) (Bead complex used)        | 2.77 ± 0.52          | 6.4 ± 2.3 (p<0.05)  | VacExp 11    |
| IM+IM+IM | (CpG-IFA) x 3 | 5  | TC0387 (CT111)                            | 2.51 ± 0.65          | 3.4 ± 2.3           | VacExp 6     |
| IM+IM+IM | (CpG-IFA) x 3 | 5  | TC0393 (CT117)                            | 3.45 ± 0.22          | 7.6 ± 0.89 (p<0.05) | VacExp 12    |
| IM+IM+IM | (CpG-IFA) x 3 | 5  | TC0394 (CT118) (Bead complex used)        | 2.66 ± 0.57          | 4 ± 3.39            | VacExp 11    |
| IM+IM+IM | (CpG-IFA) x 3 | 5  | TC0419 (CT142)                            | 2.21 ± 0.73          | 3.75 ± 0.96         | VacExp 1     |
| IM+IM+IM | (CpG-IFA) x 3 | 5  | TC0420 (CT143)                            | 1.67 ± 0.43 (p<0.05) | 2 ± 2.55            | VacExp 1     |
| IM+IM+IM | (CpG-IFA) x 3 | 4  | TC0420 (CT143)                            | 2.80 ± 0.49          | 3.5 ± 3.42          | VacExp 3     |
| IM+IM+IM | (CpG-IFA) x 3 | 5  | TC0421 (CT144) (Bead complex used)        | 2.95 ± 0.39          | 5 ± 2.45            | VacExp 12    |
| IM+IM+IM | (CpG-IFA) x 3 | 5  | TC0424 (CT147)                            | 3.80 ± 0.16 (p<0.05) | 5.2 ± 1.3           | VacExp 12    |
| IM+IM+IM | (CpG-IFA) x 3 | 5  | TC0431 (CT153)                            | 2.98 ± 0.39          | 2.8 ± 3.27          | VacExp 3     |
| IM+IM+IM | (CpG-IFA) x 3 | 5  | TC0449 (CT177)                            | 2.91 ± 0.59          | 7.2 ± 0.84 (p<0.05) | VacExp 11    |
| IM+IM+IM | (CpG-IFA) x 3 | 5  | TC0480 (CT208)                            | 2.75 ± 0.60          | 5 ± 3               | VacExp 6     |
| IM+IM+IM | (CpG-IFA) x 3 | 5  | TC0484 (CT212)                            | 2.82 ± 0.42          | 7.8 ± 0.45 (p<0.05) | VacExp 11    |
| IM+IM+IM | (CpG-IFA) x 3 | 5  | TC0497 (CT226)                            | 3.12 ± 0.61          | 5.2 ± 2.39          | VacExp 10    |
| IM+IM+IM | (CpG-IFA) x 3 | 5  | TC0501 (CT230)                            | 3.33 ± 0.99          | 6.2 ± 2.68          | VacExp 12    |
| IM+IM+IM | (CpG-IFA) x 3 | 5  | TC0511 (CT240)                            | 2.95 ± 0.71          | 4.2 ± 2.77          | VacExp 3     |
| IM+IM+IM | (CpG-IFA) x 3 | 5  | TC0513 (CT242) (Bead complex used)        | 2.94 ± 0.82          | 5.8 ± 2.05          | VacExp 12    |
| IM+IM+IM | (CpG-IFA) x 3 | 12 | TC0519 (CT248) (Combined from 2 expts)    | 2.30 ± 0.67          | 1.83 ± 2.17         | VacExp 6, 9A |
| IM+IM+IM | (CpG-IFA) x 3 | 5  | TC0524 (CT253) (Bead complex used)        | 3.46 ± 0.40          | 6.4 ± 1.52 (p<0.05) | VacExp 12    |
| IM+IM+IM | (CpG-IFA) x 3 | 5  | TC0526 (CT255)                            | 2.68 ± 0.11          | 3.6 ± 1.82          | VacExp 10    |
| IM+IM+IM | (CpG-IFA) x 3 | 10 | TC0531 (CT260) (Bead used & from 2 expts) | 3.27 ± 0.58          | 5.5 ± 3.31          | VacExp 7, 10 |
| IM+IM+IM | (CpG-IFA) x 3 | 5  | TC0539 (CT268)                            | 3.63 ± 0.46 (p<0.05) | 6.2 ± 2.17 (p<0.05) | VacExp 7     |
| IM+IM+IM | (CpG-IFA) x 3 | 5  | TC0544 (CT272)                            | 2.83 ± 0.61          | 5.4 ± 2.61          | VacExp 12    |
| IM+IM+IM | (CpG-IFA) x 3 | 5  | TC0548 (CT276) (Bead complex used)        | 2.77 ± 0.37          | 7 ± 2.24 (p<0.05)   | VacExp 11    |
| IM+IM+IM | (CpG-IFA) x 3 | 5  | TC0557 (CT284) (Bead complex used)        | 2.63 ± 0.25          | 5.6 ± 2.51          | VacExp 12    |

|          |               |   |                                    |                      |                      |           |
|----------|---------------|---|------------------------------------|----------------------|----------------------|-----------|
| IM+IM+IM | (CpG-IFA) x 3 | 5 | TC0655 (CT376)                     | 2.70 ± 0.89          | 6.2 ± 2.68           | VacExp 12 |
| IM+IM+IM | (CpG-IFA) x 3 | 5 | TC0660 (CT381)                     | 2.65 ± 0.82          | 3.4 ± 3.21           | VacExp 6  |
| IM+IM+IM | (CpG-IFA) x 3 | 5 | TC0661 (CT382) (Bead complex used) | 3.61 ± 0.58 (p<0.05) | 6 ± 2.83             | VacExp 12 |
| IM+IM+IM | (CpG-IFA) x 3 | 4 | TC0675 (CT396)                     | 2.92 ± 0.95          | 3.5 ± 1              | VacExp 6  |
| IM+IM+IM | (CpG-IFA) x 3 | 5 | TC0695m (CT414)                    | 2.53 ± 1.08          | 6 ± 1.41             | VacExp 11 |
| IM+IM+IM | (CpG-IFA) x 3 | 5 | TC0704 (CT421) (Bead complex used) | 2.90 ± 0.96          | 5.8 ± 2.17           | VacExp 12 |
| IM+IM+IM | (CpG-IFA) x 3 | 5 | TC0715 (CT431)                     | 2.94 ± 0.88          | 3.8 ± 3.11           | VacExp 7  |
| IM+IM+IM | (CpG-IFA) x 3 | 5 | TC0727 (CT443)                     | 2.32 ± 0.68          | 5.6 ± 0.89           | VacExp 6  |
| IM+IM+IM | (CpG-IFA) x 3 | 5 | TC0735 (CT450)                     | 2.96 ± 0.72          | 3.4 ± 2.97           | VacExp 7  |
| IM+IM+IM | (CpG-IFA) x 3 | 5 | TC0743 (CT458)                     | 3.54 ± 0.24 (p<0.05) | 5.6 ± 2.07           | VacExp 12 |
| IM+IM+IM | (CpG-IFA) x 3 | 5 | TC0745 (CT460)                     | 2.98 ± 0.45          | 7.6 ± 0.89 (p<0.05)  | VacExp 11 |
| IM+IM+IM | (CpG-IFA) x 3 | 5 | TC0757 (CT472)                     | 3.09 ± 0.45          | 2.6 ± 1.34           | VacExp 10 |
| IM+IM+IM | (CpG-IFA) x 3 | 5 | TC0761 (CT476)                     | 3.00 ± 0.62          | 2 ± 2.35             | VacExp 6  |
| IM+IM+IM | (CpG-IFA) x 3 | 4 | TC0765 (CT480)                     | 2.65 ± 0.33          | 8.75 ± 0.96 (p<0.05) | VacExp 11 |
| IM+IM+IM | (CpG-IFA) x 3 | 5 | TC0781 (CT494) (Bead complex used) | 2.76 ± 0.35          | 6 ± 1.87             | VacExp 11 |
| IM+IM+IM | (CpG-IFA) x 3 | 5 | TC0794 (CT507)                     | 2.58 ± 0.41          | 4.2 ± 2.68           | VacExp 6  |
| IM+IM+IM | (CpG-IFA) x 3 | 5 | TC0796 (CT509)                     | 3.22 ± 0.44          | 6.6 ± 1.67 (p<0.05)  | VacExp 10 |
| IM+IM+IM | (CpG-IFA) x 3 | 5 | TC0816n (CT529)                    | 2.47 ± 0.57          | 4.2 ± 2.49           | VacExp 11 |
| IM+IM+IM | (CpG-IFA) x 3 | 5 | TC0826 (CT539)                     | 3.40 ± 0.40          | 3 ± 3.16             | VacExp 10 |
| IM+IM+IM | (CpG-IFA) x 3 | 5 | TC0828 (CT541)                     | 2.22 ± 0.87          | 2.2 ± 3.27           | VacExp 3  |
| IM+IM+IM | (CpG-IFA) x 3 | 4 | TC0829 (CT542) (CT542 used)        | 2.98 ± 0.57          | 2 ± 1.83             | VacExp 1  |
| IM+IM+IM | (CpG-IFA) x 3 | 5 | TC0829 (CT542)                     | 3.13 ± 0.52          | 6.2 ± 2.17 (p<0.05)  | VacExp 12 |
| IM+IM+IM | (CpG-IFA) x 3 | 5 | TC0844 (CT556)                     | 3.14 ± 0.73          | 4 ± 2.24             | VacExp 7  |
| IM+IM+IM | (CpG-IFA) x 3 | 5 | TC0848 (CT559)                     | 3.37 ± 0.75          | 3 ± 3                | VacExp 6  |
| IM+IM+IM | (CpG-IFA) x 3 | 5 | TC0862 (CT573)                     | 3.50 ± 0.54 (p<0.05) | 5.6 ± 1.82           | VacExp 12 |
| IM+IM+IM | (CpG-IFA) x 3 | 5 | TC0866 (CT577)                     | 2.60 ± 0.10          | 7.2 ± 1.3 (p<0.05)   | VacExp 11 |
| IM+IM+IM | (CpG-IFA) x 3 | 5 | TC0868c (CT579)                    | 3.05 ± 0.42          | 7.2 ± 1.79 (p<0.05)  | VacExp 10 |
| IM+IM+IM | (CpG-IFA) x 3 | 5 | TC0873 (CT584)                     | 3.04 ± 0.84          | 5.4 ± 2.88           | VacExp 6  |
| IM+IM+IM | (CpG-IFA) x 3 | 5 | TC0877 (CT588)                     | 3.51 ± 0.45 (p<0.05) | 6.4 ± 3.58           | VacExp 12 |
| IM+IM+IM | (CpG-IFA) x 3 | 5 | TC0890 (CT601) (Bead complex used) | 3.37 ± 0.25          | 8.8 ± 1.3 (p<0.05)   | VacExp 12 |
| IM+IM+IM | (CpG-IFA) x 3 | 5 | TC0906 (CT616)                     | 2.91 ± 0.21          | 7.4 ± 1.34 (p<0.05)  | VacExp 11 |
| IM+IM+IM | (CpG-IFA) x 3 | 5 | TC0908 (CT618) (Bead complex used) | 2.85 ± 0.51          | 2.4 ± 2.88           | VacExp 11 |
| IM+IM+IM | (CpG-IFA) x 3 | 5 | TC0909 (CT619)                     | 2.69 ± 0.61          | 5.6 ± 2.61           | VacExp 6  |
| IM+IM+IM | (CpG-IFA) x 3 | 5 | TC0912c (CT622)                    | 2.60 ± 0.80          | 5 ± 4.12             | VacExp 10 |

#### Intranasal Immunization Regimen

|          |         |    |                                       |             |                   |                |                  |
|----------|---------|----|---------------------------------------|-------------|-------------------|----------------|------------------|
| IN+IN+IN | None    | 7  | PBS (shedding monitored for 28 days)  | 3.28 ± 0.82 | 2.43 ± 1.72       | UTHSC/VacExp 2 | Negative Control |
| IN+IN+IN | None    | 5  | PBS (shedding monitored for 37 days)  | 1.73 ± 0.64 | 2.4 ± 2.41        | VacExp 4       |                  |
| IN+IN+IN | CpG x 3 | 5  | PBS (shedding monitored for 27 days)  | 3.52 ± 0.26 | No Pathology data | VacExp B       |                  |
| IN+IN+IN | CpG x 3 | 5  | PBS (shedding monitored for 37 days)  | 1.87 ± 0.81 | 2 ± 2             | VacExp 2       |                  |
| IN+IN+IN | CpG x 3 | 5  | GST (shedding monitored for 28 days)  | 2.98 ± 1.20 | 2.6 ± 2.07        | UTHSC/VacExp 2 |                  |
| IN+IN+IN | CpG x 3 | 10 | GST (shedding monitored for 30 days)  | 3.78 ± 0.53 | 3.9 ± 2.56        | UTHSC VacExp 1 |                  |
| IN+IN+IN | CpG x 3 | 5  | GST (shedding monitored for 37 days)  | 2.93 ± 0.43 | 5 ± 2             | VacExp 4       |                  |
| IN+IN+IN | CpG x 3 | 10 | PBS (no challenge infection control)  | 0 ± 0       | 0 ± 0             | UTHSC/VacExp 2 |                  |
| IN       | None    | 5  | Live CM 50 IFU (shedding for 28 days) | 0.30 ± 0.28 | 0 ± 0             | UTHSC/VacExp 2 |                  |

|                                           |                  |    |                                          |                      |                      |               |                  |                  |
|-------------------------------------------|------------------|----|------------------------------------------|----------------------|----------------------|---------------|------------------|------------------|
| IN                                        | None             | 10 | Live CM 50 IFU (shedding for 30 days)    | 0.43 ± 0.28          | 0.8 ± 1.48           | UTHSCVacExp 1 | Positive Control |                  |
| IN                                        | None             | 5  | Live CM 50 IFU (shedding for 37 days)    | 0.51 ± 0.05          | 0.4 ± 0.89           | VacExp 4      |                  |                  |
| IN                                        | None             | 5  | Live CM 500 IFU (shedding for 27 days)   | 0.64 ± 0.21          | No Pathology data    | VacExp B      |                  |                  |
| IN                                        | None             | 1  | Live CM 500 IFU (shedding for 37 days)   | 0.87 ± /             | 0 ± /                | VacExp 2      |                  |                  |
| IN+IN+IN                                  | CpG x 3          | 5  | UV-CM (shedding monitored for 28 days)   | 3.53 ± 0.79          | 2.8 ± 3.35           | UTHSCVacExp 2 |                  |                  |
| IN+IN+IN                                  | CpG x 3          | 10 | UV-CM (shedding monitored for 30 days)   | 1.17 ± 0.69 (p<0.05) | 1.8 ± 2.9            | UTHSCVacExp 1 |                  |                  |
| IN+IN+IN                                  | CpG x 3          | 10 | UV-CM (Combined, shedding for 37 days)   | 2.75 ± 0.72          | 3.7 ± 2.75           | VacExp 2, 4   |                  |                  |
| IN+IN+IN                                  | CpG x 3          | 4  | nMOMP (Extracted from CM)                | 2.52 ± 0.59          | 2 ± 1.41             | VacExp 4      |                  |                  |
| IN+IN+IN                                  | None             | 5  | pCM03 (pCT03)                            | 3.53 ± 0.70          | 3.4 ± 3.05           | UTHSCVacExp 2 |                  |                  |
| IN+IN+IN                                  | CpG x 3          | 5  | pCM03 (pCT03) (shedding for 27 days)     | 3.43 ± 0.27          | No Pathology data    | VacExp B      |                  |                  |
| IN+IN+IN                                  | CpG x 3          | 10 | pCM03 (pCT03) (shedding for 28 days)     | 3.51 ± 0.65          | 1.2 ± 1.87 (p<0.05)  | UTHSCVacExp 2 |                  |                  |
| IN+IN+IN                                  | CpG x 3          | 10 | pCM03 (pCT03) (shedding for 30 days)     | 3.55 ± 0.67          | 5.7 ± 2.71 (p<0.05)  | UTHSCVacExp 1 |                  |                  |
| IN+IN+IN                                  | CpG x 3          | 5  | pCM03 (pCT03) (shedding for 37 days)     | 2.05 ± 0.54 (p<0.05) | 1.2 ± 1.79 (p=0.085) | VacExp 4      |                  |                  |
| IN+IN+IN                                  | CpG x 3          | 5  | TC0038 (CT667)                           | 3.29 ± 0.67          | 3 ± 2.45             | UTHSCVacExp 2 |                  |                  |
| IN+IN+IN                                  | CpG x 3          | 5  | TC0043 (CT672)                           | 2.92 ± 1.00          | 5.8 ± 2.05 (p<0.05)  | UTHSCVacExp 2 |                  |                  |
| IN+IN+IN                                  | CpG x 3          | 4  | TC0067 (CT695)                           | 2.87 ± 0.50          | 3.25 ± 3.2           | VacExp 4      |                  |                  |
| IN+IN+IN                                  | CpG x 3          | 5  | TC0197m (CT812m)                         | 3.30 ± 0.03          | No Pathology data    | VacExp B      |                  |                  |
| IN+IN+IN                                  | CpG x 3          | 5  | TC0207 (CT820)                           | 2.22 ± 0.39          | 3 ± 2.24             | VacExp 4      |                  |                  |
| IN+IN+IN                                  | CpG x 3          | 5  | TC0215 (CT828)                           | 3.32 ± 0.93          | 2.8 ± 2.95           | UTHSCVacExp 2 |                  |                  |
| IN+IN+IN                                  | CpG x 3          | 5  | TC0215 (CT828 used)                      | 2.08 ± 0.65          | 1.8 ± 2.05           | VacExp 2      |                  |                  |
| IN+IN+IN                                  | CpG x 3          | 5  | TC0248 (CT858)                           | 3.57 ± 0.40          | No Pathology data    | VacExp B      |                  |                  |
| IN+IN+IN                                  | CpG x 3          | 5  | TC0248Mut (CT858Mut-His used)            | 2.32 ± 0.17          | 3 ± 3.32             | VacExp 2      |                  |                  |
| IN+IN+IN                                  | CpG x 3          | 4  | TC0248(CT858-His used)                   | 2.15 ± 0.32          | 2.5 ± 1.73           | VacExp 2      |                  |                  |
| IN+IN+IN                                  | CpG x 3          | 5  | TC0321 (CT051)                           | 3.19 ± 0.63          | 3 ± 2.65             | VacExp 4      |                  |                  |
| IN+IN+IN                                  | CpG x 3          | 5  | TC0323 (CT053)                           | 2.89 ± 0.72          | 5.2 ± 3.83           | UTHSCVacExp 2 |                  |                  |
| IN+IN+IN                                  | CpG x 3          | 5  | TC0338 (CT067 used)                      | 2.17 ± 0.62          | 1.4 ± 1.14           | VacExp 2      |                  |                  |
| IN+IN+IN                                  | CpG x 3          | 3  | TC0499 (CT228) (2 died before infection) | 3.31 ± 0.44          | 3.33 ± 4.16          | VacExp 4      |                  |                  |
| IN+IN+IN                                  | CpG x 3          | 5  | TC0511 (CT240)                           | 1.95 ± 0.54 (p<0.05) | 4.6 ± 1.82           | VacExp 2      |                  |                  |
| IN+IN+IN                                  | CpG x 3          | 5  | TC0519 (CT248)                           | 2.88 ± 0.85          | 3.6 ± 4.1            | UTHSCVacExp 2 |                  |                  |
| IN+IN+IN                                  | CpG x 3          | 5  | TC0718 (CT434)                           | 3.18 ± 0.99          | 2.8 ± 1.64           | UTHSCVacExp 2 |                  |                  |
| IN+IN+IN                                  | CpG x 3          | 5  | TC0726 (CT442)                           | 2.44 ± 0.82          | 3.8 ± 1.3            | VacExp 2      |                  |                  |
| IN+IN+IN                                  | CpG x 3          | 5  | TC0727c-TC0248c (CT443c-CT858c)          | 3.45 ± 0.23          | No Pathology data    | VacExp B      |                  |                  |
| IN+IN+IN                                  | CpG x 3          | 5  | TC0741 (CT456)                           | 3.31 ± 0.95          | 2.2 ± 3.19           | VacExp 2      |                  |                  |
| IN+IN+IN                                  | CpG x 3          | 4  | TC0846 (CT557)                           | 3.32 ± 0.77          | 3.5 ± 1.91           | VacExp 4      |                  |                  |
| IN+IN+IN                                  | CpG x 3          | 4  | TC0891 (CT063 used)                      | 2.36 ± 0.10          | 1.75 ± 1.71          | VacExp 2      |                  |                  |
| IN+IN+IN                                  | CpG x 3          | 5  | TC0911 (CT621)                           | 3.66 ± 0.40          | 6 ± 2.92 (p<0.05)    | UTHSCVacExp 2 |                  |                  |
| <b>Combinational Immunization Regimen</b> |                  |    |                                          |                      |                      |               |                  |                  |
| IN+IM+IP                                  | CpG+(CpG-IFA)x2  | 5  | GST (5)                                  | 3.81 ± 0.58          | 4 ± 2.92             | VacExp8       |                  | Negative Control |
| IN+IM+SC                                  | CpG+(CpG-IFA)x2  | 5  | GST (5)                                  | 3.54 ± 0.33          | 6 ± 2                | VacExp 9B     |                  |                  |
| IN+IM                                     | CpG+CpG-IFA      | 20 | GST (Combined from 2 exps)               | 2.79 ± 0.44          | 4.65 ± 2.41          | VacExp 13, 14 |                  |                  |
| IN+IM+IP                                  | None+(CpG-IFA)x2 | 5  | Live CM priming + (UV-CM)x2              | 0.41 ± 0.32          | 0 ± 0                | VacExp8       |                  | Positive Control |
| IN+IM+SC                                  | None+(CpG-IFA)x2 | 5  | Live CM priming + (UV-CM)x2              | 1.63 ± 0.34          | 0.6 ± 0.89           | VacExp 9B     |                  |                  |
| IN+IM                                     | None+CpG-IFA     | 20 | Live CM priming + UV-CM, (from 2 exps)   | 0.14 ± 0.28          | 0 ± 0                | VacExp 13, 14 |                  |                  |
| IN+IM                                     | CpG+CpG-IFA      | 10 | pCM03 (pCT03) (pCT03 used)               | 2.84 ± 0.38          | 6 ± 2.83             | VacExp 13     |                  |                  |

|          |                 |    |                                       |                      |                      |           |
|----------|-----------------|----|---------------------------------------|----------------------|----------------------|-----------|
| IN+IM+IP | CpG+(CpG-IFA)x2 | 5  | pCM03 (pCT03) (pCT03 used)            | 4.01 ± 0.44 (p<0.05) | 2.6 ± 2.19           | VacExp8   |
| IN+IM    | CpG+CpG-IFA     | 6  | pCM03 (pCT03)                         | 2.90 ± 0.57          | 5.67 ± 1.97          | VacExp 14 |
| IN+IM    | CpG+CpG-IFA     | 6  | pCM03s (pCT03s) (short form was used) | 2.97 ± 0.54          | 5.67 ± 2.07          | VacExp 14 |
| IN+IM    | CpG+CpG-IFA     | 10 | TC0035c (CT664c)                      | 2.86 ± 0.24          | 5.3 ± 1.83           | VacExp 13 |
| IN+IM+SC | CpG+(CpG-IFA)x2 | 5  | TC0039 (CT668)                        | 3.08 ± 0.55          | 5.2 ± 1.64           | VacExp 9B |
| IN+IM+SC | CpG+(CpG-IFA)x2 | 5  | TC0043 (CT672)                        | 2.51 ± 0.73          | 0.8 ± 1.79 (p<0.05)  | VacExp 9B |
| IN+IM    | CpG+CpG-IFA     | 6  | TC0052 (CT681)                        | 2.71 ± 0.45          | 6.67 ± 0.82          | VacExp 14 |
| IN+IM    | CpG+CpG-IFA     | 6  | TC0052-pCM03c (CT681-pCT03c)          | 3.11 ± 0.34          | 6.5 ± 1.22           | VacExp 14 |
| IN+IM    | CpG+CpG-IFA     | 6  | TC0052c- pCM03c (CT681c-pCT03c)       | 2.39 ± 0.62 (p<0.05) | 3.33 ± 2.16          | VacExp 14 |
| IN+IM    | CpG+CpG-IFA     | 6  | TC0052n-pCM03c (CT681n- pCT03c)       | 3.54 ± 0.21          | 4.83 ± 2.56          | VacExp 14 |
| IN+IM    | CpG+CpG-IFA     | 9  | TC0066 (CT694)                        | 2.89 ± 0.46          | 6.78 ± 1.48 (p<0.05) | VacExp 13 |
| IN+IM+IP | CpG+(CpG-IFA)x2 | 5  | TC0075 (CT702)                        | 3.18 ± 0.71          | 5 ± 3.16             | VacExp8   |
| IN+IM+IP | CpG+(CpG-IFA)x2 | 5  | TC0079 (CT706)                        | 3.50 ± 0.26          | 2.2 ± 2.49 (p<0.05)  | VacExp8   |
| IN+IM+SC | CpG+(CpG-IFA)x2 | 5  | TC0151 (CT770)                        | 2.26 ± 0.58 (p<0.05) | 1.8 ± 1.3 (p<0.05)   | VacExp 9B |
| IN+IM+IP | CpG+(CpG-IFA)x2 | 5  | TC0171 (CT788)                        | 3.75 ± 0.53 (p<0.05) | 4 ± 2.92             | VacExp8   |
| IN+IM+SC | CpG+(CpG-IFA)x2 | 5  | TC0199 (CT813)                        | 2.86 ± 0.41          | 4.4 ± 2.51           | VacExp 9B |
| IN+IM    | CpG+CpG-IFA     | 10 | TC0257 (CT866)                        | 2.98 ± 0.48          | 6.4 ± 2.41           | VacExp 14 |
| IN+IM+IP | CpG+(CpG-IFA)x2 | 5  | TC0316 (CT046)                        | 3.34 ± 0.18          | 3.6 ± 3.29           | VacExp8   |
| IN+IM+SC | CpG+(CpG-IFA)x2 | 5  | TC0323 (CT053)                        | 2.61 ± 0.62          | 2.6 ± 2.41           | VacExp 9B |
| IN+IM    | CpG+CpG-IFA     | 10 | TC0364 (CT089)                        | 3.11 ± 0.42          | 5.1 ± 1.79           | VacExp 13 |
| IN+IM+IP | CpG+(CpG-IFA)x2 | 5  | TC0375 (CT099)                        | 2.42 ± 0.98          | 1.4 ± 2.19 (p<0.05)  | VacExp8   |
| IN+IM    | CpG+CpG-IFA     | 10 | TC0376 (CT100)                        | 3.04 ± 0.47          | 6.6 ± 1.96 (p<0.05)  | VacExp 13 |
| IN+IM+IP | CpG+(CpG-IFA)x2 | 5  | TC0386 (CT110)                        | 3.15 ± 0.44          | 3 ± 3                | VacExp8   |
| IN+IM    | CpG+CpG-IFA     | 10 | TC0392 (CT116)                        | 2.97 ± 0.42          | 5.1 ± 2.23           | VacExp 14 |
| IN+IM+IP | CpG+(CpG-IFA)x2 | 5  | TC0392 (CT116)                        | 3.32 ± 0.29          | 4.4 ± 3.29           | VacExp8   |
| IN+IM    | CpG+CpG-IFA     | 10 | TC0426 (CT149)                        | 3.07 ± 0.49          | 5.6 ± 3.24           | VacExp 13 |
| IN+IM+SC | CpG+(CpG-IFA)x2 | 5  | TC0453 (CT181)                        | 2.26 ± 0.63 (p<0.05) | 3 ± 4.12             | VacExp 9B |
| IN+IM+IP | CpG+(CpG-IFA)x2 | 5  | TC0596 (CT322)                        | 2.54 ± 1.01          | 6.8 ± 2.17           | VacExp8   |
| IN+IM+IP | CpG+(CpG-IFA)x2 | 5  | TC0604 (CT328)                        | 3.38 ± 0.72          | 4 ± 2.45             | VacExp8   |
| IN+IM+SC | CpG+(CpG-IFA)x2 | 5  | TC0652 (CT373)                        | 3.20 ± 0.59          | 6 ± 3.46             | VacExp 9B |
| IN+IM+SC | CpG+(CpG-IFA)x2 | 5  | TC0677 (CT398)                        | 3.02 ± 0.54          | 4.2 ± 3.9            | VacExp 9B |
| IN+IM+SC | CpG+(CpG-IFA)x2 | 5  | TC0683 (CT403)                        | 3.51 ± 0.39          | 5.8 ± 2.68           | VacExp 9B |
| IN+IM+SC | CpG+(CpG-IFA)x2 | 5  | TC0707 (CT424)                        | 2.54 ± 0.78          | 4.8 ± 3.63           | VacExp 9B |
| IN+IM+SC | CpG+(CpG-IFA)x2 | 4  | TC0718 (CT434)                        | 2.40 ± 0.85          | 2 ± 2.83             | VacExp 9B |
| IN+IM+IP | CpG+(CpG-IFA)x2 | 5  | TC0727c-TC0248c (CT443c- CT858c)      | 3.43 ± 0.66          | 2.6 ± 1.52           | VacExp8   |
| IN+IM    | CpG+CpG-IFA     | 5  | TC0727c (CT443c)                      | 2.64 ± 0.31 (p<0.05) | 5.2 ± 1.69           | VacExp 14 |
| IN+IM    | CpG+CpG-IFA     | 5  | TC0727n (CT443n)                      | 2.72 ± 0.74          | 5.14 ± 2.73          | VacExp 14 |
| IN+IM    | CpG+CpG-IFA     | 5  | TC0727n-pCM03c (CT443n- pCT03c)       | 3.07 ± 0.36          | 5.5 ± 1.52           | VacExp 14 |
| IN+IM+IP | CpG+(CpG-IFA)x2 | 5  | TC0742 (CT457)                        | 3.12 ± 0.86          | 4 ± 3.16             | VacExp8   |
| IN+IM+SC | CpG+(CpG-IFA)x2 | 5  | TC0892 (CT603)                        | 3.50 ± 0.51          | 1.2 ± 2.17 (p<0.05)  | VacExp 9B |
| IN+IM+SC | CpG+(CpG-IFA)x2 | 5  | TC0900 (CT610)                        | 3.18 ± 0.48          | 2.6 ± 2.41           | VacExp 9B |
| IN+IM+IP | CpG+(CpG-IFA)x2 | 5  | TC0901 (CT611)                        | 3.08 ± 1.22          | 4.8 ± 3.35           | VacExp8   |
| IN+IM+IP | CpG+(CpG-IFA)x2 | 5  | TC0911 (CT621)                        | 3.58 ± 0.44          | 2.4 ± 3.58           | VacExp8   |
| IN+IM+SC | CpG+(CpG-IFA)x2 | 5  | TC0921 (CT632)                        | 2.76 ± 0.75          | 3.2 ± 4.38           | VacExp 9B |

**Table 1S note:**

The data are organized into three different immunization regimens as listed in the 1<sup>st</sup> column, including intramuscular (top of Table 1S), intranasal (middle) and combinational (bottom). The corresponding adjuvants used for each group are listed in the 2<sup>nd</sup> column. CpG plus incomplete Freund's adjuvant (IFA) were used for intramuscular, intraperitoneal, and subcutaneous injections while CpG alone for intranasal inoculation with the exception that no adjuvant was used for intranasal inoculation with live chlamydial organisms. The sample size for each group is listed in the 3<sup>rd</sup> column. Mice with similar experimental conditions are combined into one group while those with different experimental conditions are kept in the original groups even though they were immunized with the same antigens. The group IDs and antigens used for immunizing

the corresponding groups are listed in the 4<sup>th</sup> column, which are from 17 different experiments as listed in the 7<sup>th</sup> column or last column. All negative (green) and positive (blue) immunization controls from the same immunization regimen are clustered on top of each immunization regimen. The negative controls were used to compare with individual antigen groups under the same regimen to identify antigen groups with statistically different chlamydial burden (5<sup>th</sup> column) and hydrosalpinx score (6<sup>th</sup> column). The chlamydial burden is listed as area-under-curves from each group. After ANNOVA analysis, a 2-tailed Wilcoxon Rank Sum test was used to do the comparison, which revealed both infection/pathology-reducing (red) and -enhancing/exacerbating (pink) antigens.
